# Supplementary material for: Job strain and loss of healthy life years between ages 50 and 75 by sex and occupational position: analyses of 64 934 individuals from four prospective cohort studies
Source: PubMed Central journal article supplement (PMC6035484; doi:10.1136/oemed-2017-104644), 2018-05-07

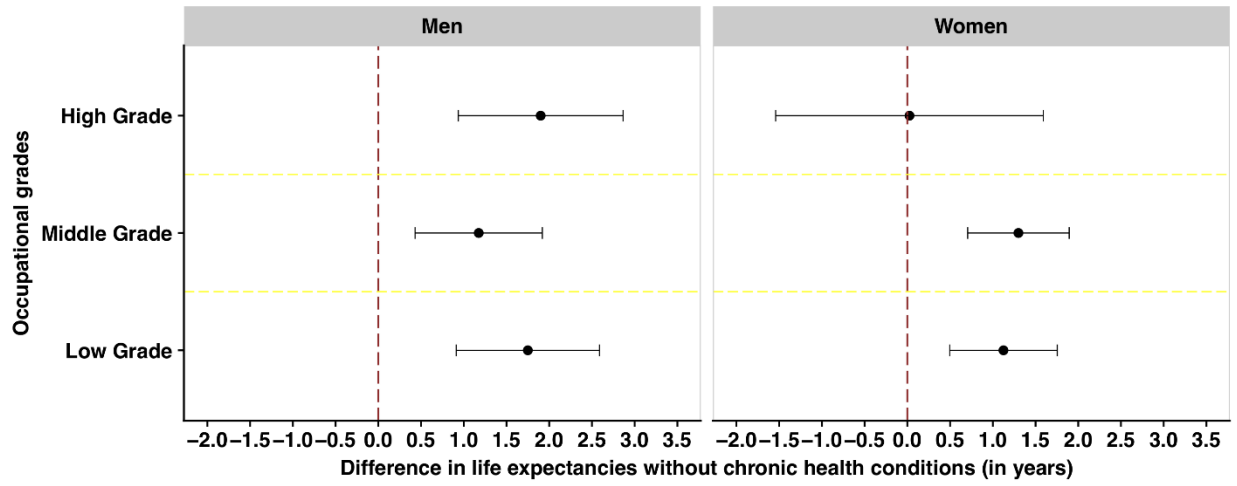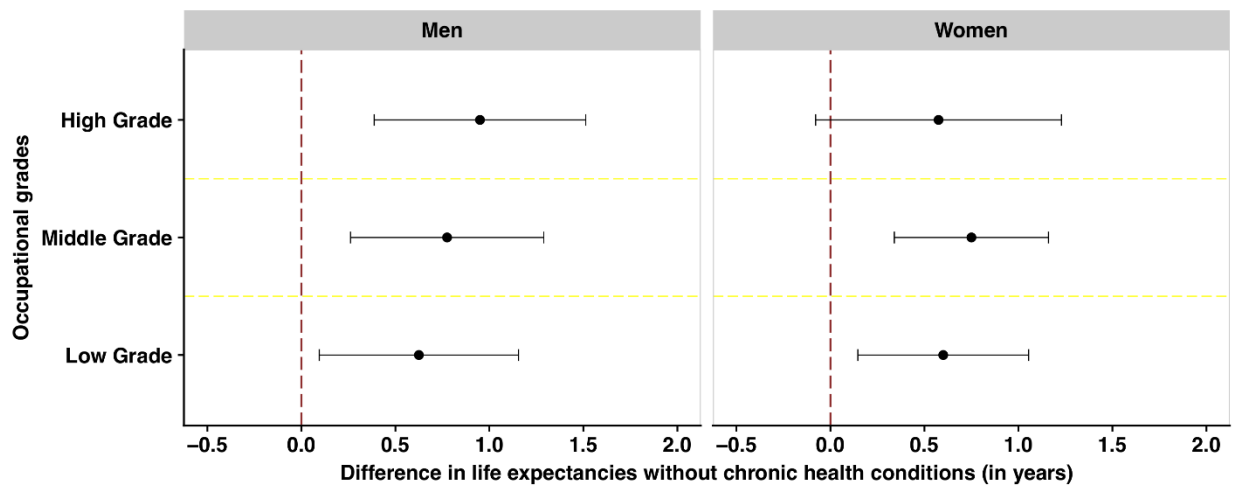

Supplement: oemed-2017-104644supp001.pdf [file oemed-2017-104644supp001.pdf]
