# Supplementary material for: Job strain and loss of healthy life years between ages 50 and 75 by sex and occupational position: analyses of 64 934 individuals from four prospective cohort studies
Source: PubMed Central journal article supplement (PMC6035484; doi:10.1136/oemed-2017-104644), 2018-05-07
Supplement: oemed-2017-104644supp002.pdf [file oemed-2017-104644supp002.pdf]

**eTable 1.** Distribution of follow-up time in years during the study period by age at inclusion.

| Age at inclusion      | Follow-up time (years) |         |      | No. of individuals |
|-----------------------|------------------------|---------|------|--------------------|
|                       | Minimum                | Maximum | Mean |                    |
| <b>FPS (Finland)</b>  |                        |         |      |                    |
| 50 – 54               | 0                      | 16      | 6.1  | 25225              |
| 55 – 59               | 0                      | 16      | 8.5  | 8909               |
| 60 – 64               | 0                      | 16      | 8.9  | 1610               |
| 65 – 69               | 0                      | 9       | 3.3  | 36                 |
| 70 – 74               | -                      | -       | -    | -                  |
| All ages              | 0                      | 16      | 6.8  | 35780              |
| <b>GAZEL (France)</b> |                        |         |      |                    |
| 50 – 54               | 0                      | 17      | 13.8 | 10251              |
| 55 – 59               | 0                      | 17      | 14.2 | 1040               |
| 60 – 64               | 0                      | 13      | 1.9  | 11                 |
| 65 – 69               | -                      | -       | -    | -                  |
| 70 – 74               | -                      | -       | -    | -                  |
| All ages              | 0                      | 17      | 13.8 | 11302              |
| <b>SLOSH (Sweden)</b> |                        |         |      |                    |
| 50 – 54               | 0                      | 8       | 4.8  | 3482               |
| 55 – 59               | 0                      | 8       | 7.3  | 2016               |
| 60 – 64               | 0                      | 8       | 7.4  | 1958               |
| 65 – 69               | 0                      | 8       | 7.1  | 850                |
| 70 – 74               | 0                      | 2       | 0.4  | 25                 |
| All ages              | 0                      | 8       | 6.0  | 8330               |
| <b>WHII (UK)</b>      |                        |         |      |                    |
| 50 – 54               | 0                      | 28      | 15.6 | 7680               |
| 55 – 59               | 0                      | 28      | 14.9 | 1250               |
| 60 – 64               | 0                      | 23      | 6.0  | 155                |
| 65 – 69               | 0                      | 16      | 1.2  | 27                 |
| 70 – 74               | -                      | -       | -    | -                  |
| All ages              | 0                      | 28      | 15.2 | 9121               |

**eTable 2. Operationalization of exposure and outcome variables in each study cohort.**

|                           | <b>Job strain</b>                                                                                                                                                                                                                                                                                                                                                                                                                                                                                                                                                                                                                                             | <b>Self-rated health*</b>                                                                                                                                                                                                                                   | <b>Chronic disease#</b>                                                                                                                                                                                                                                                                                                                                                                                                                                                                                         |
|---------------------------|---------------------------------------------------------------------------------------------------------------------------------------------------------------------------------------------------------------------------------------------------------------------------------------------------------------------------------------------------------------------------------------------------------------------------------------------------------------------------------------------------------------------------------------------------------------------------------------------------------------------------------------------------------------|-------------------------------------------------------------------------------------------------------------------------------------------------------------------------------------------------------------------------------------------------------------|-----------------------------------------------------------------------------------------------------------------------------------------------------------------------------------------------------------------------------------------------------------------------------------------------------------------------------------------------------------------------------------------------------------------------------------------------------------------------------------------------------------------|
| <b>FPS<br/>(Finland)</b>  | <p>Job Content Questionnaire (JCQ)</p> <p><b>Questions demand scale:</b></p> <ol style="list-style-type: none"> <li>1. Working very hard/intensively</li> <li>2. No excessive amount of work/too much effort</li> <li>3. Enough time</li> </ol> <p><b>Questions control scale:</b></p> <ol style="list-style-type: none"> <li>1. Learn new things</li> <li>2. High level of skill</li> <li>3. Creativity/initiative</li> <li>4. Repetitive work</li> <li>5. A lot of say/what to do</li> <li>6. Little freedom/how to do</li> </ol> <p><b>Job strain:</b> a combination of mean demands scores above the median and mean control scores below the median.</p> | <p>Question: “How is your health?”</p> <p><b>Good health</b>    Good,<br/>                            Fairly good</p> <p><b>Suboptimal health</b>    Average, Fairly poor<br/>                            and Poor</p>                                      | <p>Question: “Has a doctor told you that you have or have had ...?”</p> <p>(1) myocardial infarction or angina pectoris, (2) stroke, (3) chronic bronchitis or asthma, (4) diabetes or high blood sugar; and (5) cancer or a malignant tumour of any kind except skin cancer**</p> <p>* For the first two waves cancer was not inquired, thus information from cancer register was used</p> <p><b>No chronic disease</b>    No to any of the above</p> <p><b>Chronic disease</b>    Yes to any of the above</p> |
| <b>GAZEL<br/>(France)</b> | <p>Job Content Questionnaire (JCQ)</p> <p><b>Questions demands scale:</b></p> <ol style="list-style-type: none"> <li>1. Working fast</li> <li>2. Working hard/intensively</li> <li>3. No excessive amount of work/too much effort</li> <li>4. Enough time</li> <li>5. Conflicting demands</li> </ol>                                                                                                                                                                                                                                                                                                                                                          | <p>Question: “How would you judge the state of your general health?”</p> <p>The respondents were asked to rate their health on an eight level scale ranging from “very good” (coded 1) to “very poor” (coded 8)</p> <p><b>Good health</b>    Scores 1-4</p> | <p>Subjects were asked to put a check mark next to the diseases in a list of diseases and symptoms from which they had suffered over the past 12 months including:</p> <p>Myocardial infarction<br/>Diabetes<br/>Stroke<br/>Chronic bronchitis<br/>Asthma<br/>Cancer</p>                                                                                                                                                                                                                                        |

|                              |                                                                                                                                                                                                                                                                                                                                                                                                                                                                                                                                                                                                                                                                                                                       |                                                                                                                                                                                                              |                                                                                                                                                                                                                                                                                                                                                                                                                                                                                                                                                                                                                                                                                                                            |
|------------------------------|-----------------------------------------------------------------------------------------------------------------------------------------------------------------------------------------------------------------------------------------------------------------------------------------------------------------------------------------------------------------------------------------------------------------------------------------------------------------------------------------------------------------------------------------------------------------------------------------------------------------------------------------------------------------------------------------------------------------------|--------------------------------------------------------------------------------------------------------------------------------------------------------------------------------------------------------------|----------------------------------------------------------------------------------------------------------------------------------------------------------------------------------------------------------------------------------------------------------------------------------------------------------------------------------------------------------------------------------------------------------------------------------------------------------------------------------------------------------------------------------------------------------------------------------------------------------------------------------------------------------------------------------------------------------------------------|
|                              | <p><b>Questions control scale:</b></p> <ol style="list-style-type: none"> <li>1. Learn new things</li> <li>2. High level of skill</li> <li>3. Creativity/initiative</li> <li>4. Repetitive work</li> <li>5. A lot of say/what to do</li> <li>6. Little freedom/how to do</li> </ol> <p><b>Job strain:</b> a combination of mean demands scores above the median and mean control scores below the median.</p>                                                                                                                                                                                                                                                                                                         | <p><b>Suboptimal health</b>      Scores 5-8</p>                                                                                                                                                              | <p><b>No chronic disease</b>      Absence of any of the above</p> <p><b>Chronic disease</b>      Presence of any of the above</p>                                                                                                                                                                                                                                                                                                                                                                                                                                                                                                                                                                                          |
| <p><b>SLOSH (Sweden)</b></p> | <p>Demand Control Questionnaire (DCQ)</p> <p><b>Questions demands scale:</b></p> <ol style="list-style-type: none"> <li>1. Working fast</li> <li>2. Working hard/intensively</li> <li>3. No excessive amount of work/too much effort</li> <li>4. Enough time</li> <li>5. Conflicting demands</li> </ol> <p><b>Questions control scale:</b></p> <ol style="list-style-type: none"> <li>1. Learn new things</li> <li>2. High level of skill</li> <li>3. Creativity/initiative</li> <li>4. Repetitive work</li> <li>5. A lot of say/what to do</li> <li>6. Little freedom/how to do</li> </ol> <p><b>Job strain:</b> a combination of mean demands scores above the median and mean control scores below the median.</p> | <p>Question: “How would you rate your general state of health?”</p> <p><b>Good health</b>      Very good, Quite good</p> <p><b>Suboptimal health</b>      Neither good nor bad, Quite poor and Very poor</p> | <p>Question: “Do you have or have you had any of the following long-standing and/or serious diseases or complaints during the past 2 years and how much has it impacted on your life?”</p> <p>(1) cardiovascular disease, (2) chronic obstructive lung disease, (3) asthma and (4) diabetes</p> <p>Response options for each condition:<br/>No<br/>Yes, but it does not impact on my life at all<br/>Yes, impacts my life somewhat<br/>Yes, impacts my life a lot</p> <p>Information on cancer is from cancer register.</p> <p><b>No chronic disease</b>      No to any of the above and no malignant cancer diagnose in the cancer register</p> <p><b>Chronic disease</b>      Yes to any of the above or a malignant</p> |

|                  |                                                                                                                                                                                                                                                                                                                                                                                                                                                                                                                                                                                                                                                                                           |                                                                                                                                                                         |                                                                                                                                                                                                                                                                                                                                                                                                                                                                                                                                                                                                                                                                                                                                                                                  |
|------------------|-------------------------------------------------------------------------------------------------------------------------------------------------------------------------------------------------------------------------------------------------------------------------------------------------------------------------------------------------------------------------------------------------------------------------------------------------------------------------------------------------------------------------------------------------------------------------------------------------------------------------------------------------------------------------------------------|-------------------------------------------------------------------------------------------------------------------------------------------------------------------------|----------------------------------------------------------------------------------------------------------------------------------------------------------------------------------------------------------------------------------------------------------------------------------------------------------------------------------------------------------------------------------------------------------------------------------------------------------------------------------------------------------------------------------------------------------------------------------------------------------------------------------------------------------------------------------------------------------------------------------------------------------------------------------|
|                  |                                                                                                                                                                                                                                                                                                                                                                                                                                                                                                                                                                                                                                                                                           |                                                                                                                                                                         | cancer diagnose in the cancer register                                                                                                                                                                                                                                                                                                                                                                                                                                                                                                                                                                                                                                                                                                                                           |
| <b>WHII (UK)</b> | <p>Minor modification of Job Content Questionnaire (JCQ)</p> <p><b>Questions demand scale:</b></p> <ol style="list-style-type: none"> <li>1. Working very fast</li> <li>2. Working very hard/intensively</li> <li>3. Enough time</li> <li>4. Conflicting demands</li> </ol> <p><b>Questions control scale:</b></p> <ol style="list-style-type: none"> <li>1. Learn new things</li> <li>2. High level of skill</li> <li>3. Creativity/initiative</li> <li>4. Repetitive work</li> <li>5. A lot of say/what to do</li> <li>6. Little freedom/how to do</li> </ol> <p><b>Job strain:</b> a combination of mean demands scores above the median and mean control scores below the median.</p> | <p>Question: “In general would you say your health is...?”</p> <p><b>Good health</b>    Excellent, Very good, Good</p> <p><b>Suboptimal health</b>    Fair and Poor</p> | <p>Question: “Has a doctor ever told you that you have had ...</p> <p>(1) a heart attack or any other heart trouble? (enlarged heart, fluid on lungs, heart failure), (2) stroke (stroke or transient ischaemic attack), (4) Diabetes”</p> <p>Question. “Do you have any longstanding illness, diseases or medical conditions of which you have sought treatment in the last 12 months? If yes, please list.</p> <p>(3) chronic lung disease (includes conditions coded as chronic bronchitis or asthma)</p> <p>Information on cancer is from cancer register.</p> <p><b>No chronic disease</b>    No to any of the above and no cancer diagnose in the cancer register</p> <p><b>Chronic disease</b>    Yes to any of the above or a cancer diagnose in the cancer register</p> |

\*Used in combination with mortality to assess healthy life-expectancy (HLE)

# Used in combination with mortality to assess chronic-disease free life expectancy (CDFLE)

**eTable 3.** Cohort specific odds ratios for self-reported health transitions from multinomial logistic models.

|                       | Transition                           |                                      |                                  |                                    |
|-----------------------|--------------------------------------|--------------------------------------|----------------------------------|------------------------------------|
|                       | Healthy to Unhealthy<br>OR (95% CI)* | Unhealthy to Healthy<br>OR (95% CI)* | Healthy to Death<br>OR (95% CI)* | Unhealthy to Death<br>OR (95% CI)* |
| <b>FPS (Finland)</b>  |                                      |                                      |                                  |                                    |
| No job strain         | 1.00                                 | 1.00                                 | 1.00                             | 1.00                               |
| Job strain            | 1.69 (1.63-1.76)                     | 0.59 (0.57-0.62)                     | 1.55 (1.31-1.84)                 | 0.92 (0.77-1.09)                   |
| <b>GAZEL (France)</b> |                                      |                                      |                                  |                                    |
| No job strain         | 1.00                                 | 1.00                                 | 1.00                             | 1.00                               |
| Job strain            | 1.53 (1.47-1.58)                     | 0.65 (0.63-0.68)                     | 1.16 (0.93-1.45)                 | 0.76 (0.61-0.95)                   |
| <b>SLOSH (Sweden)</b> |                                      |                                      |                                  |                                    |
| No job strain         | 1.00                                 | 1.00                                 | 1.00                             | 1.00                               |
| Job strain            | 1.48 (1.32-1.67)                     | 0.67 (0.60-0.76)                     | 2.13 (1.04-4.38)                 | 1.44 (0.70-2.96)                   |
| <b>WHII (UK)</b>      |                                      |                                      |                                  |                                    |
| No job strain         | 1.00                                 | 1.00                                 | 1.00                             | 1.00                               |
| Job strain            | 1.42 (1.33-1.51)                     | 0.71 (0.66-0.75)                     | 1.14 (0.98-1.34)                 | 0.81 (0.69-0.95)                   |

\*adjusted for age, sex and occupational position.

**eTable 4.** Cohort specific odds ratios for chronic disease transitions from multinomial logistic models.

|                       | Healthy to Unhealthy<br>OR (95% CI)* | Healthy to Death<br>OR (95% CI)* | Unhealthy to Death<br>OR (95% CI)* |
|-----------------------|--------------------------------------|----------------------------------|------------------------------------|
| <b>FPS (Finland)</b>  |                                      |                                  |                                    |
| No job strain         | 1.00                                 | 1.00                             | 1.00                               |
| Job strain            | 1.22 (1.18-1.27)                     | 1.16 (0.99-1.35)                 | 0.95 (0.81-1.11)                   |
| <b>GAZEL (France)</b> |                                      |                                  |                                    |
| No job strain         | 1.00                                 | 1.00                             | 1.00                               |
| Job strain            | 1.15 (1.12-1.19)                     | 1.14 (0.91-1.42)                 | 0.99 (0.79-1.24)                   |
| <b>SLOSH (Sweden)</b> |                                      |                                  |                                    |
| No job strain         | 1.00                                 | 1.00                             | 1.00                               |
| Job strain            | 1.24 (1.11-1.39)                     | 2.18 (1.06-4.49)                 | 1.76 (0.86-3.61)                   |
| <b>WHII (UK)</b>      |                                      |                                  |                                    |
| No job strain         | 1.00                                 | 1.00                             | 1.00                               |
| Job strain            | 1.15 (1.09-1.21)                     | 1.15 (0.98-1.34)                 | 1.00 (0.85-1.17)                   |

\*adjusted for age, sex and occupational position.

**eTable 5.** Combined partial life expectancy, healthy life expectancy (HLE) and proportion of life spent in good health between the ages of 50 and 75 by job strain and sex

|               | Life expectancy (95%<br>CI) | Healthy life<br>expectancy<br>(95% CI) | Unhealthy life<br>expectancy<br>(95% CI) | Proportion of life<br>spent in good<br>health<br>(%) |
|---------------|-----------------------------|----------------------------------------|------------------------------------------|------------------------------------------------------|
| <b>Men</b>    |                             |                                        |                                          |                                                      |
| No job strain | 24.5 (24.4-24.6)            | 19.4 (19.2-19.6)                       | 5.1 (5.0-5.3)                            | 78.9 (78.2-79.7)                                     |
| Job strain    | 24.1 (23.8-24.4)            | 17.4 (17.0-17.8)                       | 6.7 (6.4-7.0)                            | 72.0 (70.6-73.4)                                     |
| <b>Women</b>  |                             |                                        |                                          |                                                      |
| No job strain | 25.0 (24.9-25.1)            | 19.7 (19.5-19.9)                       | 5.3 (5.2-5.5)                            | 78.6 (78.0-79.2)                                     |
| Job strain    | 24.9 (24.8-25.1)            | 18.1 (17.9-18.4)                       | 6.8 (6.6-7.1)                            | 72.6 (71.6-73.7)                                     |

**eTable 6.** Combined partial life expectancy, chronic-disease free life expectancy (CDFLE) and proportion of life spent free of chronic disease between the ages of 50 and 75 by job strain and sex, among all individuals with data on chronic disease

|               | Life expectancy<br>(95% CI) | Chronic disease-free life<br>expectancy<br>(95% CI) | Unhealthy life<br>expectancy<br>(95% CI) | Proportion of life<br>spent free from chronic<br>disease<br>(%) |
|---------------|-----------------------------|-----------------------------------------------------|------------------------------------------|-----------------------------------------------------------------|
| <b>Men</b>    |                             |                                                     |                                          |                                                                 |
| No job strain | 24.5 (24.4-24.6)            | 13.6 (13.4-13.9)                                    | 10.9 (10.7-11.1)                         | 55.6 (54.7-56.5)                                                |
| Job strain    | 24.3 (24.2-24.5)            | 12.0 (11.5-12.5)                                    | 12.3 (11.8-12.8)                         | 49.4 (47.3-51.6)                                                |
| <b>Women</b>  |                             |                                                     |                                          |                                                                 |
| No job strain | 25.0 (24.9-25.1)            | 14.6 (14.4-14.9)                                    | 10.4 (10.1-10.6)                         | 58.5 (57.5-59.5)                                                |
| Job strain    | 24.9 (24.8-25.0)            | 13.8 (13.2-14.4)                                    | 11.1 (10.5-11.7)                         | 55.4 (52.8-58.0)                                                |

**eTable 7.** Combined partial life expectancy, chronic disease-free life expectancy and proportion of life spent without chronic disease between the ages of 50 and 75 by job strain and sex, among people without chronic disease at baseline

|               | Life expectancy<br>(95% CI) | Chronic disease- free life<br>expectancy<br>(95% CI) | Life expectancy with<br>chronic disease<br>(95% CI) | Proportion of life<br>spent free from<br>chronic disease<br>(%) |
|---------------|-----------------------------|------------------------------------------------------|-----------------------------------------------------|-----------------------------------------------------------------|
| <b>Men</b>    |                             |                                                      |                                                     |                                                                 |
| No job strain | 24.6 (24.5-24.7)            | 17.4 (17.2-17.6)                                     | 7.2 (7.0-7.4)                                       | 70.6 (69.9-71.4)                                                |
| Job strain    | 24.4 (24.2-24.6)            | 16.6 (16.2-16.9)                                     | 7.8 (7.5-8.2)                                       | 68.0 (66.5-69.5)                                                |
| <b>Women</b>  |                             |                                                      |                                                     |                                                                 |
| No job strain | 25.1 (25.0-25.1)            | 18.6 (18.4-18.8)                                     | 6.5 (6.3-6.6)                                       | 74.3 (73.5-75.0)                                                |
| Job strain    | 25.0 (24.9-25.1)            | 18.0 (17.7-18.3)                                     | 7.1 (6.7-7.4)                                       | 71.8 (70.5-73.2)                                                |

**eTable 8.** Combined partial life expectancy, chronic disease-free life expectancy (CDFLE) and proportion of life spent without chronic health conditions between the ages of 50 and 75 by occupational position and job strain for men and women without chronic health disease at baseline.

|                      | Life expectancy<br>(95% CI) | Healthy life expectancy<br>(95%CI) | Unhealthy life expectancy<br>(95%CI) | Proportion of life<br>spent in good health<br>(%) |
|----------------------|-----------------------------|------------------------------------|--------------------------------------|---------------------------------------------------|
| <b>Men</b>           |                             |                                    |                                      |                                                   |
| High grade           |                             |                                    |                                      |                                                   |
| <i>No job strain</i> | 25.0 (24.9-25.1)            | 17.9 (17.5-18.2)                   | 7.2 (6.8-7.5)                        | 71.4 (70.0-72.8)                                  |
| <i>Job strain</i>    | 24.9 (24.7-25.1)            | 16.9 (16.3-17.5)                   | 8.0 (7.4-8.6)                        | 68.0 (65.5-70.4)                                  |
| Middle grade         |                             |                                    |                                      |                                                   |
| <i>No job strain</i> | 24.7 (24.5-24.8)            | 17.5 (17.2-17.8)                   | 7.1 (6.8-7.5)                        | 71.0 (69.9-72.2)                                  |
| <i>Job strain</i>    | 24.4 (24.1-24.8)            | 16.7 (16.2-17.3)                   | 7.7 (7.1-8.2)                        | 68.5 (66.1-70.9)                                  |
| Low grade            |                             |                                    |                                      |                                                   |
| <i>No job strain</i> | 24.2 (24.0-24.3)            | 16.8 (16.4-17.1)                   | 7.4 (7.0-7.8)                        | 69.4 (68.0-70.8)                                  |
| <i>Job strain</i>    | 23.9 (23.6-24.2)            | 16.1 (15.6-16.7)                   | 7.8 (7.2-8.3)                        | 67.6 (64.8-70.3)                                  |
| <b>Women</b>         |                             |                                    |                                      |                                                   |
| High grade           |                             |                                    |                                      |                                                   |
| <i>No job strain</i> | 25.3 (25.2-25.4)            | 19.0 (18.6-19.3)                   | 6.4 (6.0-6.7)                        | 74.9 (73.4-76.4)                                  |
| <i>Job strain</i>    | 25.4 (25.1-25.6)            | 18.4 (17.7-19.1)                   | 7.0 (6.3-7.6)                        | 72.6 (69.5-75.6)                                  |
| Middle grade         |                             |                                    |                                      |                                                   |
| <i>No job strain</i> | 25.1 (25.0-25.2)            | 18.8 (18.5-19.0)                   | 6.3 (6.1-6.6)                        | 74.7 (73.5-75.9)                                  |
| <i>Job strain</i>    | 24.9 (24.7-25.1)            | 18.0 (17.6-18.4)                   | 6.9 (6.5-7.3)                        | 72.3 (70.4-74.1)                                  |
| Low grade            |                             |                                    |                                      |                                                   |
| <i>No job strain</i> | 24.8 (24.6-24.9)            | 18.1 (17.8-18.5)                   | 6.7 (6.3-7.0)                        | 73.1 (71.9-74.4)                                  |
| <i>Job strain</i>    | 24.8 (24.6-25.0)            | 17.5 (17.0-18.0)                   | 7.3 (6.8-7.7)                        | 70.6 (68.7-72.6)                                  |



**eTable 9a.** Partial life expectancy, healthy life expectancy (HLE) and proportion of life spent in good health between the ages of 50 and 75 by occupational position and job strain for *men*.

|                          | Life expectancy<br>(95% CI) | Healthy life expectancy<br>(95%CI) | Unhealthy life expectancy<br>(95%CI) | Proportion of life spent in good health (%) |
|--------------------------|-----------------------------|------------------------------------|--------------------------------------|---------------------------------------------|
| <b>FPS (Finland)</b>     |                             |                                    |                                      |                                             |
| High grade               |                             |                                    |                                      |                                             |
| <i>No job strain</i>     | 24.7 (24.4-24.9)            | 19.2 (18.7-19.8)                   | 5.4 (5.0-5.9)                        | 78.0                                        |
| <i>Job strain</i>        | 24.4 (23.9-24.9)            | 16.6 (15.6-17.6)                   | 7.8 (6.9-8.7)                        | 67.9                                        |
| Middle grade             |                             |                                    |                                      |                                             |
| <i>No job strain</i>     | 24.1 (23.7-24.6)            | 16.4 (15.7-17.0)                   | 7.8 (7.2-8.4)                        | 67.8                                        |
| <i>Job strain</i>        | 24.1 (23.5-24.6)            | 14.0 (13.1-14.9)                   | 10.1 (9.2-10.9)                      | 58.2                                        |
| Low grade                |                             |                                    |                                      |                                             |
| <i>No job strain</i>     | 23.8 (23.3-24.3)            | 13.3 (12.5-14.1)                   | 10.4 (9.7-11.2)                      | 56.1                                        |
| <i>Job strain</i>        | 23.6 (23.0-24.2)            | 10.1 (9.3-10.9)                    | 13.5 (12.6-14.3)                     | 42.9                                        |
| <b>GAZEL (France)</b>    |                             |                                    |                                      |                                             |
| High grade               |                             |                                    |                                      |                                             |
| <i>No job strain</i>     | 24.9 (24.7-25.0)            | 21.9 (21.6-22.2)                   | 3.0 (2.8-3.2)                        | 88.0                                        |
| <i>Job strain</i>        | 24.8 (24.4-25.2)            | 20.5 (20.0-21.1)                   | 4.3 (3.8-4.7)                        | 82.9                                        |
| Middle grade             |                             |                                    |                                      |                                             |
| <i>No job strain</i>     | 24.6 (24.4-24.7)            | 21.0 (20.8-21.3)                   | 3.5 (3.3-3.7)                        | 85.7                                        |
| <i>Job strain</i>        | 24.4 (24.1-24.8)            | 19.4 (18.9-19.9)                   | 5.1 (4.7-5.5)                        | 79.3                                        |
| Low grade                |                             |                                    |                                      |                                             |
| <i>No job strain</i>     | 24.1 (23.7-24.5)            | 19.6 (19.0-20.1)                   | 4.6 (4.2-4.9)                        | 81.1                                        |
| <i>Job strain</i>        | 24.2 (23.6-24.7)            | 17.6 (16.9-18.3)                   | 6.5 (6.0-7.1)                        | 72.9                                        |
| <b>SLOSH (Sweden)</b>    |                             |                                    |                                      |                                             |
| High grade               |                             |                                    |                                      |                                             |
| <i>No job strain</i>     | 25.1 (24.3-25.8)            | 19.8 (18.6-21.0)                   | 5.2 (4.2-6.3)                        | 79.1                                        |
| <i>Job strain</i>        | 23.9 (21.6-26.2)            | 18.2 (15.7-20.7)                   | 5.7 (4.0-7.4)                        | 76.1                                        |
| Middle grade             |                             |                                    |                                      |                                             |
| <i>No job strain</i>     | 24.7 (24.1-25.3)            | 20.5 (19.6-21.5)                   | 4.2 (3.4-4.9)                        | 83.1                                        |
| <i>Job strain</i>        | 23.6 (21.6-25.7)            | 18.3 (16.1-20.6)                   | 5.3 (3.8-6.8)                        | 77.6                                        |
| Low grade                |                             |                                    |                                      |                                             |
| <i>No job strain</i>     | 25.3 (24.7-25.8)            | 18.8 (17.8-19.8)                   | 6.5 (5.6-7.4)                        | 74.4                                        |
| <i>Job strain</i>        | 24.5 (23.5-25.4)            | 16.6 (14.8-18.4)                   | 7.8 (6.3-9.4)                        | 67.9                                        |
| <b>Whitehall II (UK)</b> |                             |                                    |                                      |                                             |
| High grade               |                             |                                    |                                      |                                             |
| <i>No job strain</i>     | 24.9 (24.7-25.0)            | 22.5 (22.2-22.7)                   | 2.4 (2.2-2.6)                        | 90.4                                        |
| <i>Job strain</i>        | 24.8 (24.5-25.1)            | 21.6 (21.0-22.3)                   | 3.2 (2.6-3.8)                        | 87.2                                        |
| Middle grade             |                             |                                    |                                      |                                             |
| <i>No job strain</i>     | 24.4 (24.3-24.6)            | 21.0 (20.7-21.3)                   | 3.4 (3.2-3.6)                        | 86.1                                        |
| <i>Job strain</i>        | 24.4 (24.1-24.7)            | 20.1 (19.5-20.6)                   | 4.3 (3.8-4.9)                        | 82.3                                        |
| Low grade                |                             |                                    |                                      |                                             |
| <i>No job strain</i>     | 23.6 (23.2-24.0)            | 18.2 (17.5-19.0)                   | 5.4 (4.8-5.9)                        | 77.3                                        |
| <i>Job strain</i>        | 23.1 (22.5-23.7)            | 15.9 (14.6-17.2)                   | 7.2 (6.0-8.4)                        | 68.7                                        |

**eTable 9b.** Partial life expectancy, healthy life expectancy (HLE) and proportion of life spent in good health between the ages of 50 and 75 by occupational position and job strain for *women*.

|                          | Partial life expectancy between the ages of 50 and 75 |                                    |                                         |                                                   |
|--------------------------|-------------------------------------------------------|------------------------------------|-----------------------------------------|---------------------------------------------------|
|                          | Life expectancy<br>(95% CI)                           | Healthy life expectancy<br>(95%CI) | Unhealthy life<br>expectancy<br>(95%CI) | Proportion of life spent<br>in good health<br>(%) |
| <b>FPS (Finland)</b>     |                                                       |                                    |                                         |                                                   |
| High grade               |                                                       |                                    |                                         |                                                   |
| <i>No job strain</i>     | 25.2 (25.0-25.3)                                      | 19.5 (19.1-19.8)                   | 5.7 (5.4-6.1)                           | 77.3                                              |
| <i>Job strain</i>        | 25.1 (24.8-25.3)                                      | 17.1 (16.4-17.7)                   | 8.0 (7.4-8.6)                           | 68.1                                              |
| Middle grade             |                                                       |                                    |                                         |                                                   |
| <i>No job strain</i>     | 25.0 (24.9-25.2)                                      | 17.4 (17.1-17.8)                   | 7.6 (7.3-7.9)                           | 69.6                                              |
| <i>Job strain</i>        | 24.9 (24.7-25.1)                                      | 15.2 (14.8-15.6)                   | 9.7 (9.4-10.1)                          | 60.9                                              |
| Low grade                |                                                       |                                    |                                         |                                                   |
| <i>No job strain</i>     | 24.7 (24.4-25.0)                                      | 13.8 (13.0-14.5)                   | 10.9 (10.2-11.7)                        | 55.7                                              |
| <i>Job strain</i>        | 24.7 (24.4-24.9)                                      | 11.4 (10.8-12.0)                   | 13.3 (12.7-13.8)                        | 46.2                                              |
| <b>GAZEL (France)</b>    |                                                       |                                    |                                         |                                                   |
| High grade               |                                                       |                                    |                                         |                                                   |
| <i>No job strain</i>     | 25.1 (24.9-25.4)                                      | 21.7 (21.3-22.1)                   | 3.5 (3.1-3.8)                           | 86.3                                              |
| <i>Job strain</i>        | 25.1 (24.6-25.7)                                      | 20.8 (19.9-21.7)                   | 4.3 (3.5-5.1)                           | 82.9                                              |
| Middle grade             |                                                       |                                    |                                         |                                                   |
| <i>No job strain</i>     | 25.0 (24.8-25.2)                                      | 21.0 (20.7-21.4)                   | 4.0 (3.7-4.2)                           | 84.1                                              |
| <i>Job strain</i>        | 25.0 (24.7-25.3)                                      | 19.5 (19.0-20.0)                   | 5.5 (5.1-6.0)                           | 77.9                                              |
| Low grade                |                                                       |                                    |                                         |                                                   |
| <i>No job strain</i>     | 24.7 (24.3-25.0)                                      | 19.7 (19.2-20.2)                   | 5.0 (4.6-5.4)                           | 79.7                                              |
| <i>Job strain</i>        | 24.7 (24.3-25.0)                                      | 17.6 (16.9-18.2)                   | 7.1 (6.5-7.6)                           | 71.3                                              |
| <b>SLOSH (Sweden)</b>    |                                                       |                                    |                                         |                                                   |
| High grade               |                                                       |                                    |                                         |                                                   |
| <i>No job strain</i>     | 25.6 (25.3-26.0)                                      | 20.7 (19.7-21.7)                   | 4.9 (4.0-5.9)                           | 80.7                                              |
| <i>Job strain</i>        | 25.2 (24.5-26.0)                                      | 19.8 (18.3-21.3)                   | 5.4 (4.1-6.8)                           | 78.4                                              |
| Middle grade             |                                                       |                                    |                                         |                                                   |
| <i>No job strain</i>     | 25.5 (25.2-25.8)                                      | 21.6 (21.0-22.2)                   | 3.9 (3.3-4.5)                           | 84.7                                              |
| <i>Job strain</i>        | 25.1 (24.4-25.7)                                      | 20.3 (19.1-21.4)                   | 4.8 (3.8-5.8)                           | 80.9                                              |
| Low grade                |                                                       |                                    |                                         |                                                   |
| <i>No job strain</i>     | 25.7 (25.4-26.0)                                      | 19.5 (18.5-20.5)                   | 6.2 (5.2-7.1)                           | 76.0                                              |
| <i>Job strain</i>        | 25.4 (24.9-25.9)                                      | 18.3 (16.9-19.8)                   | 7.1 (5.8-8.4)                           | 72.2                                              |
| <b>Whitehall II (UK)</b> |                                                       |                                    |                                         |                                                   |
| High grade               |                                                       |                                    |                                         |                                                   |
| <i>No job strain</i>     | 25.1 (24.9-25.3)                                      | 22.5 (22.1-23.0)                   | 2.5 (2.2-2.9)                           | 89.8                                              |
| <i>Job strain</i>        | 25.3 (24.9-25.6)                                      | 22.1 (21.1-23.1)                   | 3.1 (2.2-4.1)                           | 87.5                                              |
| Middle grade             |                                                       |                                    |                                         |                                                   |
| <i>No job strain</i>     | 24.7 (24.5-24.9)                                      | 20.9 (20.5-21.4)                   | 3.8 (3.4-4.1)                           | 84.7                                              |
| <i>Job strain</i>        | 24.8 (24.5-25.1)                                      | 19.5 (18.6-20.3)                   | 5.3 (4.5-6.1)                           | 78.6                                              |
| Low grade                |                                                       |                                    |                                         |                                                   |
| <i>No job strain</i>     | 23.9 (23.7-24.2)                                      | 17.9 (17.4-18.4)                   | 6.1 (5.6-6.6)                           | 74.6                                              |
| <i>Job strain</i>        | 24.2 (23.7-24.6)                                      | 16.1 (15.1-17.1)                   | 8.1 (7.1-9.0)                           | 66.6                                              |

**eTable 10a.** Partial life expectancy, chronic disease-free life expectancy (CDFLE) and proportion of life spent without chronic health conditions between the ages of 50 and 75 by occupational position and job strain for men with data on chronic disease

|                          | Life expectancy<br>(95% CI) | Chronic disease-free life<br>expectancy<br>(95%CI) | Life expectancy with<br>chronic disease<br>(95%CI) | Proportion of life spent<br>without chronic disease<br>(%) |
|--------------------------|-----------------------------|----------------------------------------------------|----------------------------------------------------|------------------------------------------------------------|
| <b>FPS (Finland)</b>     |                             |                                                    |                                                    |                                                            |
| High grade               |                             |                                                    |                                                    |                                                            |
| <i>No job strain</i>     | 24.5 (24.1-24.7)            | 14.7 (13.9-15.0)                                   | 9.7 (9.4-10.6)                                     | 60.2                                                       |
| <i>Job strain</i>        | 24.4 (23.9-24.8)            | 13.3 (11.6-14.6)                                   | 11.1 (9.7-12.7)                                    | 54.4                                                       |
| Middle grade             |                             |                                                    |                                                    |                                                            |
| <i>No job strain</i>     | 24.1 (23.6-24.3)            | 13.3 (12.4-13.9)                                   | 10.9 (10.1-11.5)                                   | 55.0                                                       |
| <i>Job strain</i>        | 24.1 (23.2-24.5)            | 11.2 (9.5-13.0)                                    | 13.0 (10.9-14.4)                                   | 46.3                                                       |
| Low grade                |                             |                                                    |                                                    |                                                            |
| <i>No job strain</i>     | 23.5 (23.0-23.8)            | 12.7 (12.0-13.1)                                   | 10.8 (10.3-11.5)                                   | 54.0                                                       |
| <i>Job strain</i>        | 23.1 (22.6-23.9)            | 9.9 (9.2-11.2)                                     | 13.2 (12.0-14.3)                                   | 42.9                                                       |
| <b>GAZEL (France)</b>    |                             |                                                    |                                                    |                                                            |
| High grade               |                             |                                                    |                                                    |                                                            |
| <i>No job strain</i>     | 24.8 (24.7-25.0)            | 15.3 (14.9-15.7)                                   | 9.5 (9.1-10.0)                                     | 61.7                                                       |
| <i>Job strain</i>        | 24.8 (24.4-25.1)            | 14.1 (13.0-15.8)                                   | 10.6 (9.0-11.8)                                    | 57.1                                                       |
| Middle grade             |                             |                                                    |                                                    |                                                            |
| <i>No job strain</i>     | 24.5 (24.4-24.7)            | 14.5 (14.2-14.8)                                   | 10.0 (9.7-10.4)                                    | 59.1                                                       |
| <i>Job strain</i>        | 24.5 (24.1-24.8)            | 14.3 (13.2-14.8)                                   | 10.2 (9.7-11.4)                                    | 58.5                                                       |
| Low grade                |                             |                                                    |                                                    |                                                            |
| <i>No job strain</i>     | 24.0 (23.7-24.4)            | 13.4 (12.8-14.3)                                   | 10.6 (9.9-11.4)                                    | 55.9                                                       |
| <i>Job strain</i>        | 24.1 (23.6-24.6)            | 13.7 (12.3-14.7)                                   | 10.4 (9.4-11.9)                                    | 56.7                                                       |
| <b>SLOSH (Sweden)</b>    |                             |                                                    |                                                    |                                                            |
| High grade               |                             |                                                    |                                                    |                                                            |
| <i>No job strain</i>     | 25.7 (25.4-25.9)            | 13.9 (12.7-15.3)                                   | 11.7 (10.3-12.9)                                   | 54.3                                                       |
| <i>Job strain</i>        | 25.5 (24.6-25.9)            | 9.6 (6.5-12.4)                                     | 15.9 (13.3-19.2)                                   | 37.6                                                       |
| Middle grade             |                             |                                                    |                                                    |                                                            |
| <i>No job strain</i>     | 25.2 (24.8-25.5)            | 13.5 (12.4-14.9)                                   | 11.6 (10.4-12.8)                                   | 53.8                                                       |
| <i>Job strain</i>        | 24.3 (23.2-25.4)            | 11.7 (9.7-13.9)                                    | 12.5 (10.7-14.8)                                   | 48.4                                                       |
| Low grade                |                             |                                                    |                                                    |                                                            |
| <i>No job strain</i>     | 25.4 (25.0-25.7)            | 12.8 (11.7-13.9)                                   | 12.6 (11.5-13.8)                                   | 50.4                                                       |
| <i>Job strain</i>        | 24.7 (24.1-25.5)            | 11.3 (9.8-13.1)                                    | 13.4 (11.9-15.0)                                   | 45.7                                                       |
| <b>Whitehall II (UK)</b> |                             |                                                    |                                                    |                                                            |
| High grade               |                             |                                                    |                                                    |                                                            |
| <i>No job strain</i>     | 24.8 (24.7-25.0)            | 13.2 (12.6-13.5)                                   | 11.7 (11.3-12.2)                                   | 53.1                                                       |
| <i>Job strain</i>        | 24.7 (24.6-25.1)            | 12.6 (10.9-13.6)                                   | 12.1 (11.2-13.9)                                   | 51.0                                                       |
| Middle grade             |                             |                                                    |                                                    |                                                            |
| <i>No job strain</i>     | 24.4 (24.2-24.5)            | 12.9 (12.5-13.4)                                   | 11.5 (11.0-12.0)                                   | 53.0                                                       |
| <i>Job strain</i>        | 24.4 (24.1-24.7)            | 12.3 (11.5-13.3)                                   | 12.1 (11.1-12.9)                                   | 50.5                                                       |
| Low grade                |                             |                                                    |                                                    |                                                            |
| <i>No job strain</i>     | 23.4 (23.0-23.8)            | 13.3 (12.3-14.1)                                   | 10.1 (9.4-11.2)                                    | 56.7                                                       |
| <i>Job strain</i>        | 23.3 (22.6-24.1)            | 10.3 (7.4-12.0)                                    | 13.0 (11.6-16.1)                                   | 44.3                                                       |

**eTable 10b.** Partial life expectancy, chronic disease-free expectancy (CDFLE) and proportion of life spent without chronic health conditions between the ages of 50 and 75 by occupational position and job strain for women with data on chronic disease.

|                          | Life expectancy<br>(95% CI) | Chronic disease-free life<br>expectancy<br>(95%CI) | Life expectancy with<br>chronic disease<br>(95%CI) | Proportion of life spent<br>without chronic disease<br>(%) |
|--------------------------|-----------------------------|----------------------------------------------------|----------------------------------------------------|------------------------------------------------------------|
| <b>FPS (Finland)</b>     |                             |                                                    |                                                    |                                                            |
| High grade               |                             |                                                    |                                                    |                                                            |
| <i>No job strain</i>     | 25.1 (25.0-25.3)            | 14.9 (14.6-15.4)                                   | 10.2 (9.8-10.6)                                    | 59.3                                                       |
| <i>Job strain</i>        | 25.2 (24.8-25.3)            | 14.5 (13.1-15.4)                                   | 10.7 (9.7-12.0)                                    | 57.5                                                       |
| Middle grade             |                             |                                                    |                                                    |                                                            |
| <i>No job strain</i>     | 24.9 (24.8-25.0)            | 15.0 (14.7-15.3)                                   | 9.9 (9.6-10.3)                                     | 60.2                                                       |
| <i>Job strain</i>        | 24.8 (24.7-25.1)            | 13.8 (13.2-14.3)                                   | 11.0 (10.5-11.6)                                   | 55.8                                                       |
| Low grade                |                             |                                                    |                                                    |                                                            |
| <i>No job strain</i>     | 24.6 (24.4-24.8)            | 14.0 (13.4-14.4)                                   | 10.6 (10.1-11.2)                                   | 56.9                                                       |
| <i>Job strain</i>        | 24.6 (24.2-24.8)            | 12.9 (12.2-13.7)                                   | 11.7 (10.8-12.3)                                   | 52.4                                                       |
| <b>GAZEL (France)</b>    |                             |                                                    |                                                    |                                                            |
| High grade               |                             |                                                    |                                                    |                                                            |
| <i>No job strain</i>     | 25.2 (24.9-25.4)            | 15.0 (14.1-16.3)                                   | 10.2 (9.0-11.1)                                    | 59.6                                                       |
| <i>Job strain</i>        | 25.1 (24.6-25.7)            | 16.7 (11.3-19.4)                                   | 8.4 (6.0-13.7)                                     | 66.5                                                       |
| Middle grade             |                             |                                                    |                                                    |                                                            |
| <i>No job strain</i>     | 25.0 (24.8-25.2)            | 15.3 (14.7-15.9)                                   | 9.7 (9.2-10.3)                                     | 61.0                                                       |
| <i>Job strain</i>        | 25.0 (24.6-25.2)            | 14.6 (13.4-15.4)                                   | 10.4(9.6-11.6)                                     | 58.3                                                       |
| Low grade                |                             |                                                    |                                                    |                                                            |
| <i>No job strain</i>     | 24.8 (24.3-25.0)            | 14.7 (14.1-16.1)                                   | 10.1 (8.7-10.6)                                    | 59.4                                                       |
| <i>Job strain</i>        | 24.8 (24.2-25.0)            | 13.1 (12.1-14.3)                                   | 11.6 (10.2-12.6)                                   | 53.0                                                       |
| <b>SLOSH (Sweden)</b>    |                             |                                                    |                                                    |                                                            |
| High grade               |                             |                                                    |                                                    |                                                            |
| <i>No job strain</i>     | 25.8 (25.6-25.9)            | 15.5 (14.2-17.0)                                   | 10.3 (8.8-11.6)                                    | 60.1                                                       |
| <i>Job strain</i>        | 25.7 (25.1-26.0)            | 13.4 (10.3-16.8)                                   | 12.2 (8.7-15.2)                                    | 52.3                                                       |
| Middle grade             |                             |                                                    |                                                    |                                                            |
| <i>No job strain</i>     | 25.5 (25.3-25.7)            | 15.9 (14.6-16.9)                                   | 9.6 (8.7-10.7)                                     | 62.2                                                       |
| <i>Job strain</i>        | 24.8 (24.1-25.5)            | 13.8 (12.3-15.5)                                   | 11.0 (9.5-12.8)                                    | 55.6                                                       |
| Low grade                |                             |                                                    |                                                    |                                                            |
| <i>No job strain</i>     | 25.6 (25.2-25.8)            | 14.3 (13.4-15.7)                                   | 11.3 (9.9-12.1)                                    | 55.8                                                       |
| <i>Job strain</i>        | 25.3 (24.5-25.6)            | 13.7 (12.2-15.0)                                   | 11.6 (10.2-13.0)                                   | 54.1                                                       |
| <b>Whitehall II (UK)</b> |                             |                                                    |                                                    |                                                            |
| High grade               |                             |                                                    |                                                    |                                                            |
| <i>No job strain</i>     | 25.0 (24.8-25.2)            | 12.6 (11.2-13.6)                                   | 12.4 (11.4-13.9)                                   | 50.4                                                       |
| <i>Job strain</i>        | 25.1 (24.6-25.5)            | 13.2 (9.5-15.7)                                    | 11.9 (9.5-15.5)                                    | 52.5                                                       |
| Middle grade             |                             |                                                    |                                                    |                                                            |
| <i>No job strain</i>     | 24.7 (24.5-24.9)            | 14.0 (13.3-14.9)                                   | 10.6 (9.8-11.4)                                    | 57.0                                                       |
| <i>Job strain</i>        | 24.7 (24.4-25.0)            | 12.8 (11.7-14.3)                                   | 11.9 (10.4-12.9)                                   | 52.0                                                       |
| Low grade                |                             |                                                    |                                                    |                                                            |
| <i>No job strain</i>     | 24.0 (23.7-24.2)            | 14.4 (13.7-15.0)                                   | 9.6 (9.0-10.3)                                     | 60.1                                                       |
| <i>Job strain</i>        | 24.0 (23.6-24.4)            | 13.2 (11.9-14.6)                                   | 10.8 (9.5-12.0)                                    | 55.0                                                       |

**eTable 11a.** Partial life expectancy, chronic disease-free life expectancy (CDFLE) and proportion of life spent without chronic health conditions between the ages of 50 and 75 by occupational position and job strain for men without chronic health conditions at baseline.

|                          | Life expectancy<br>(95% CI) | Chronic disease-free life<br>expectancy<br>(95%CI) | Life expectancy with<br>chronic disease<br>(95%CI) | Proportion of life spent<br>without chronic disease<br>(%) |
|--------------------------|-----------------------------|----------------------------------------------------|----------------------------------------------------|------------------------------------------------------------|
| <b>FPS (Finland)</b>     |                             |                                                    |                                                    |                                                            |
| High grade               |                             |                                                    |                                                    |                                                            |
| <i>No job strain</i>     | 24.6 (24.3-24.8)            | 18.0 (17.5-18.5)                                   | 6.6 (6.1-7.1)                                      | 73.3                                                       |
| <i>Job strain</i>        | 24.4 (23.9-24.9)            | 17.5 (16.3-18.6)                                   | 6.9 (5.8-8.0)                                      | 71.7                                                       |
| Middle grade             |                             |                                                    |                                                    |                                                            |
| <i>No job strain</i>     | 24.2 (23.9-24.6)            | 17.6 (17.0-18.2)                                   | 6.7 (6.1-7.2)                                      | 72.5                                                       |
| <i>Job strain</i>        | 24.2 (23.5-24.9)            | 16.7 (15.5-17.9)                                   | 7.4 (6.3-8.6)                                      | 69.2                                                       |
| Low grade                |                             |                                                    |                                                    |                                                            |
| <i>No job strain</i>     | 23.5 (23.2-23.9)            | 16.0 (15.4-16.5)                                   | 7.6 (7.0-8.1)                                      | 67.9                                                       |
| <i>Job strain</i>        | 23.0 (22.4-23.7)            | 15.4 (14.5-16.2)                                   | 7.7 (6.8-8.5)                                      | 66.6                                                       |
| <b>GAZEL (France)</b>    |                             |                                                    |                                                    |                                                            |
| High grade               |                             |                                                    |                                                    |                                                            |
| <i>No job strain</i>     | 25.0 (24.8-25.1)            | 18.6 (18.2-19.1)                                   | 6.3 (5.9-6.7)                                      | 74.7                                                       |
| <i>Job strain</i>        | 24.9 (24.5-25.3)            | 18.2 (17.4-19.1)                                   | 6.6 (5.8-7.4)                                      | 73.3                                                       |
| Middle grade             |                             |                                                    |                                                    |                                                            |
| <i>No job strain</i>     | 24.7 (24.6-24.9)            | 18.3 (18.0-18.6)                                   | 6.4 (6.1-6.7)                                      | 74.1                                                       |
| <i>Job strain</i>        | 24.7 (24.4-25.0)            | 18.2 (17.6 -18.9)                                  | 6.5 (5.8-7.1)                                      | 73.7                                                       |
| Low grade                |                             |                                                    |                                                    |                                                            |
| <i>No job strain</i>     | 24.3 (23.9-24.6)            | 17.6 (16.9-18.3)                                   | 6.7 (6.0-7.3)                                      | 72.5                                                       |
| <i>Job strain</i>        | 24.3 (23.8-24.8)            | 17.7 (16.8-18.5)                                   | 6.6 (5.7-7.5)                                      | 72.7                                                       |
| <b>SLOSH (Sweden)</b>    |                             |                                                    |                                                    |                                                            |
| High grade               |                             |                                                    |                                                    |                                                            |
| <i>No job strain</i>     | 25.6 (25.3-25.9)            | 17.1 (16.0-18.2)                                   | 8.5 (7.3-9.6)                                      | 66.7                                                       |
| <i>Job strain</i>        | 25.6 (24.7-25.9)            | 15.0 (13.3-16.9)                                   | 10.6 (8.5-12.1)                                    | 58.6                                                       |
| Middle grade             |                             |                                                    |                                                    |                                                            |
| <i>No job strain</i>     | 25.2 (24.7-25.5)            | 16.8 (15.8-17.9)                                   | 8.4 (7.3-9.2)                                      | 66.7                                                       |
| <i>Job strain</i>        | 24.4 (23.3-25.4)            | 15.1 (13.3-16.6)                                   | 9.3 (7.9-11.0)                                     | 61.8                                                       |
| Low grade                |                             |                                                    |                                                    |                                                            |
| <i>No job strain</i>     | 25.3 (24.9-25.7)            | 16.5 (15.5-17.6)                                   | 8.8 (7.7-9.8)                                      | 65.2                                                       |
| <i>Job strain</i>        | 24.7 (24.1-25.5)            | 14.5 (13.3-16.1)                                   | 10.2 (8.8-11.6)                                    | 58.6                                                       |
| <b>Whitehall II (UK)</b> |                             |                                                    |                                                    |                                                            |
| High grade               |                             |                                                    |                                                    |                                                            |
| <i>No job strain</i>     | 24.9 (24.8-25.1)            | 17.7 (17.2-18.1)                                   | 7.2 (6.8-7.7)                                      | 70.9                                                       |
| <i>Job strain</i>        | 24.7 (24.5-25.0)            | 16.9 (16.0-17.8)                                   | 7.8 (7.0-8.7)                                      | 68.3                                                       |
| Middle grade             |                             |                                                    |                                                    |                                                            |
| <i>No job strain</i>     | 24.5 (24.3-24.6)            | 17.4 (17.0-17.7)                                   | 7.1 (6.8-7.5)                                      | 70.9                                                       |
| <i>Job strain</i>        | 24.4 (24.2-24.7)            | 16.9 (16.1-17.7)                                   | 7.5 (6.8-8.3)                                      | 69.1                                                       |
| Low grade                |                             |                                                    |                                                    |                                                            |
| <i>No job strain</i>     | 23.5 (23.1-23.9)            | 17.0 (16.3-17.7)                                   | 6.5 (5.9-7.2)                                      | 72.2                                                       |
| <i>Job strain</i>        | 23.5 (22.7-24.3)            | 17.0 (15.7-18.3)                                   | 6.5 (5.2-7.8)                                      | 72.3                                                       |

**eTable 11b.** Partial life expectancy, chronic disease-free life expectancy (CDFLE) and proportion of life spent without chronic health conditions between the ages of 50 and 75 by occupational position and job strain for women without chronic health conditions at baseline.

|                          | Life expectancy<br>(95% CI) | Chronic disease-free life<br>expectancy<br>(95%CI) | Life expectancy with<br>chronic disease<br>(95%CI) | Proportion of life spent<br>without chronic disease<br>(%) |
|--------------------------|-----------------------------|----------------------------------------------------|----------------------------------------------------|------------------------------------------------------------|
| <b>FPS (Finland)</b>     |                             |                                                    |                                                    |                                                            |
| High grade               |                             |                                                    |                                                    |                                                            |
| <i>No job strain</i>     | 25.1 (25.0-25.2)            | 19.2 (18.9-19.5)                                   | 5.9 (5.6-6.2)                                      | 76.5                                                       |
| <i>Job strain</i>        | 25.2 (24.9-25.4)            | 18.9 (18.2-19.7)                                   | 6.3 (5.5-7.0)                                      | 75.1                                                       |
| Middle grade             |                             |                                                    |                                                    |                                                            |
| <i>No job strain</i>     | 24.9 (24.8-25.0)            | 19.0 (18.7-19.2)                                   | 5.9 (5.7-6.2)                                      | 76.1                                                       |
| <i>Job strain</i>        | 24.8 (24.5-25.0)            | 18.3 (17.8-18.8)                                   | 6.5 (6.0-6.9)                                      | 73.9                                                       |
| Low grade                |                             |                                                    |                                                    |                                                            |
| <i>No job strain</i>     | 24.5 (24.3-24.8)            | 17.7 (17.3-18.2)                                   | 6.8 (6.4-7.3)                                      | 72.3                                                       |
| <i>Job strain</i>        | 24.6 (24.3-24.9)            | 17.1 (16.5-17.8)                                   | 7.5 (6.8-8.1)                                      | 69.7                                                       |
| <b>GAZEL (France)</b>    |                             |                                                    |                                                    |                                                            |
| High grade               |                             |                                                    |                                                    |                                                            |
| <i>No job strain</i>     | 25.3 (24.7-25.9)            | 19.8 (18.1-21.4)                                   | 5.5 (3.9-7.1)                                      | 78.1                                                       |
| <i>Job strain</i>        | 25.4 (25.2-25.6)            | 19.7 (19.0-20.4)                                   | 5.7 (5.0-6.4)                                      | 77.6                                                       |
| Middle grade             |                             |                                                    |                                                    |                                                            |
| <i>No job strain</i>     | 25.1 (24.8-25.4)            | 19.2 (18.4-19.9)                                   | 5.9 (5.2-6.6)                                      | 76.5                                                       |
| <i>Job strain</i>        | 25.2 (25.0-25.4)            | 19.2 (18.6-19.7)                                   | 6.0 (5.5-6.5)                                      | 76.1                                                       |
| Low grade                |                             |                                                    |                                                    |                                                            |
| <i>No job strain</i>     | 25.1 (24.7-25.5)            | 18.6 (17.7-19.5)                                   | 6.5 (5.6-7.3)                                      | 74.3                                                       |
| <i>Job strain</i>        | 24.9 (24.6-25.2)            | 18.4 (17.7-19.2)                                   | 6.5 (5.8-7.2)                                      | 74.0                                                       |
| <b>SLOSH (Sweden)</b>    |                             |                                                    |                                                    |                                                            |
| High grade               |                             |                                                    |                                                    |                                                            |
| <i>No job strain</i>     | 25.7 (25.5-25.9)            | 19.1 (18.1-20.2)                                   | 6.6 (5.5-7.7)                                      | 74.3                                                       |
| <i>Job strain</i>        | 25.6 (25.1-26.0)            | 17.6 (15.8-19.0)                                   | 8.1 (6.5-9.8)                                      | 68.5                                                       |
| Middle grade             |                             |                                                    |                                                    |                                                            |
| <i>No job strain</i>     | 25.5 (25.3-25.7)            | 19.0 (18.1-19.7)                                   | 6.5 (5.6-7.5)                                      | 74.5                                                       |
| <i>Job strain</i>        | 25.0 (24.4-25.5)            | 17.3 (16.1-18.5)                                   | 7.7 (6.5-9.1)                                      | 69.2                                                       |
| Low grade                |                             |                                                    |                                                    |                                                            |
| <i>No job strain</i>     | 25.6 (25.3-25.8)            | 18.6 (17.8-19.6)                                   | 7.0 (6.0-7.8)                                      | 72.6                                                       |
| <i>Job strain</i>        | 25.4 (24.8-25.6)            | 17.1 (15.7-18.1)                                   | 8.3 (7.2-9.5)                                      | 67.4                                                       |
| <b>Whitehall II (UK)</b> |                             |                                                    |                                                    |                                                            |
| High grade               |                             |                                                    |                                                    |                                                            |
| <i>No job strain</i>     | 25.1 (24.9-25.3)            | 17.8 (17.1-18.5)                                   | 7.3 (6.5-8.0)                                      | 71.0                                                       |
| <i>Job strain</i>        | 25.4 (25.0-25.8)            | 17.4 (15.9-18.8)                                   | 8.0 (6.7-9.3)                                      | 68.5                                                       |
| Middle grade             |                             |                                                    |                                                    |                                                            |
| <i>No job strain</i>     | 24.8 (24.6-25.0)            | 17.9 (17.3-18.4)                                   | 6.9 (6.4-7.5)                                      | 72.1                                                       |
| <i>Job strain</i>        | 24.8 (24.5-25.1)            | 17.2 (16.4-18.0)                                   | 7.6 (6.8-8.4)                                      | 69.4                                                       |
| Low grade                |                             |                                                    |                                                    |                                                            |
| <i>No job strain</i>     | 24.1 (23.8-24.3)            | 17.7 (17.1-18.3)                                   | 6.3 (5.8-6.9)                                      | 73.6                                                       |
| <i>Job strain</i>        | 24.1 (23.7-24.6)            | 17.2 (16.2-18.2)                                   | 6.9 (6.0-7.9)                                      | 71.2                                                       |

**eTable 12.** Healthy life expectancy (HLE) between the ages of 50 and 75 by job strain, sex and occupational position

|                     | Men    |                                               | Women  |                                               |
|---------------------|--------|-----------------------------------------------|--------|-----------------------------------------------|
|                     | n      | Healthy life expectancy (95% CI) <sup>a</sup> | n      | Healthy life expectancy (95% CI) <sup>a</sup> |
| <b>All</b>          | 11 540 |                                               | 18 594 |                                               |
| Low strain          | 7 492  | 19.8 (19.6-20.0)                              | 11 018 | 20.0 (19.8-20.3)                              |
| Job strain          | 4 048  | 17.3 (16.9-17.6)                              | 7 576  | 17.6 (17.3-17.9)                              |
| <b>High grade</b>   |        |                                               |        |                                               |
| Low strain          | 2 560  | 21.5 (21.2-21.8)                              | 1 591  | 21.6 (21.2-21.9)                              |
| Job strain          | 1 448  | 19.2 (18.6-19.7)                              | 2 553  | 19.5 (18.9-20.1)                              |
| <b>Middle grade</b> |        |                                               |        |                                               |
| Low strain          | 3 487  | 19.9 (19.6-20.3)                              | 6 648  | 20.3 (20.0-20.6)                              |
| Job strain          | 1 629  | 17.7 (17.2-18.2)                              | 3 785  | 17.9 (17.5-18.3)                              |
| <b>Low grade</b>    |        |                                               |        |                                               |
| Low strain          | 1 445  | 18.0 (17.5-18.5)                              | 2 779  | 18.3 (17.8-18.7)                              |
| Job strain          | 971    | 15.0 (14.4-15.6)                              | 1 238  | 15.3 (14.8-15.8)                              |

<sup>a</sup> estimated life years spent in good self-rated health between ages of 50 and 75

**eTable 13.** Chronic disease-free life expectancy (CDFLE) between the ages of 50 and 75 among people without chronic disease at baseline, by job strain, sex and occupational position

|                     | Men    |                                                            | Women  |                                                            |
|---------------------|--------|------------------------------------------------------------|--------|------------------------------------------------------------|
|                     | n      | Chronic disease-free life expectancy (95% CI) <sup>a</sup> | n      | Chronic disease-free life expectancy (95% CI) <sup>a</sup> |
| <b>All</b>          | 11 519 |                                                            | 18 552 |                                                            |
| Low strain          | 7 481  | 13.6 (13.4-13.9)                                           | 11 013 | 14.6 (14.4-14.9)                                           |
| Job strain          | 4 038  | 12.0 (11.5-12.5)                                           | 7 539  | 13.8 (13.2-14.4)                                           |
| <b>High grade</b>   |        |                                                            |        |                                                            |
| Low strain          | 2 562  | 16.5 (16.0-17.0)                                           | 1 590  | 16.9 (16.3-17.5)                                           |
| Job strain          | 1 448  | 15.4 (14.7-16.2)                                           | 2 551  | 15.9 (15.2-16.7)                                           |
| <b>Middle grade</b> |        |                                                            |        |                                                            |
| Low strain          | 3 483  | 16.3 (15.8-16.8)                                           | 6 643  | 16.7 (16.2-17.2)                                           |
| Job strain          | 1 628  | 15.3 (14.7-15.9)                                           | 3 774  | 15.8 (15.3-16.4)                                           |
| <b>Low grade</b>    |        |                                                            |        |                                                            |
| Low strain          | 1 436  | 15.4 (14.7-16.1)                                           | 2 780  | 15.9 (15.2-16.6)                                           |
| Job strain          | 962    | 14.2 (13.4-14.9)                                           | 1 214  | 14.9 (14.3-15.6)                                           |

<sup>a</sup> estimated life years spent free of chronic disease between ages of 50 and 75
